# Supplementary material for: Graphene oxide films as a novel tool for the modulation of myeloid-derived suppressor cell activity in the context of multiple sclerosis
Source: Royal Society of Chemistry journal article supplement (doi:10.1039/d3nr05351b), 2024-01-01
Supplement: d3nr05351b1.pdf [file d3nr05351b1.pdf]

*Supporting information*

**Table S1.** List of antibodies for flow cytometry used in this study.

| <b>Antibody</b>   | <b>Target</b>                      | <b>Dilution<sup>a</sup></b> | <b>Class</b>       | <b>Clone</b> | <b>Manufacturer</b> | <b>Antibody ID</b> |
|-------------------|------------------------------------|-----------------------------|--------------------|--------------|---------------------|--------------------|
| CD11b-PerCP Cy5.5 | Myeloid cells                      | 0.2µg                       | Rat monoclonal     | M1/70        | BD Biosciences      | AB_394002          |
| Ly-6C-FITC        | MDSCs                              | 0.2µg                       | Rat monoclonal     | AL-21        | BD Biosciences      | AB_394628          |
| Ly-6G-PE          |                                    | 0.2µg                       | Rat monoclonal     | 1A8          | BD Biosciences      | AB_394208          |
| F4/80-eFluor450   | Macrophages                        | 0.2µg                       | Rat monoclonal     | BM8          | eBioscience         | AB_1548747         |
| CD11c-APC         | Dendritic cells                    | 0.2µg                       | Hamster monoclonal | N418         | eBioscience         | AB_469346          |
| MHC-II-PE-Cy7.7   | Antigen presenting cells           | 0.2µg                       | Rat monoclonal     | M5/114.15.2  | eBioscience         | AB_10870792        |
| CD3e-APC          | T cells                            | 0.2µg                       | Hamster monoclonal | 145-2C11     | BD Biosciences      | AB_469315          |
| CD4-PE            | Helper T CD4 <sup>+</sup> cells    | 0.1µg                       | Rat monoclonal     | RM4-5        | BD Biosciences      | AB_394585          |
| CD8a-FITC         | Citotoxic T CD8 <sup>+</sup> cells | 0.25µg                      | Rat monoclonal     | 53-6.7       | BD Biosciences      | AB_394568          |

<sup>a</sup>Refers to the amount per million cells. Abbreviations: FITC, fluorescein isothiocyanate; PE, phycoerythrin; PB, pacific blue.

## SUPPLEMENTARY FIGURES

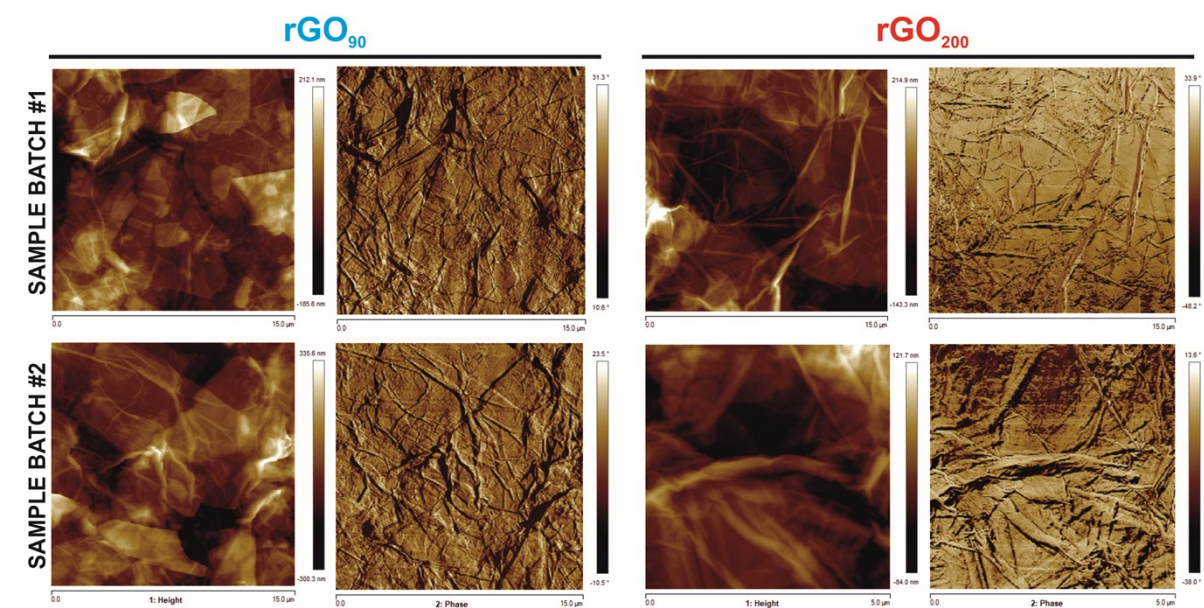

**Figure S1.** Representative AFM height and phase images of two independent batches of  $rGO_{90}$  and  $rGO_{200}$  substrates.

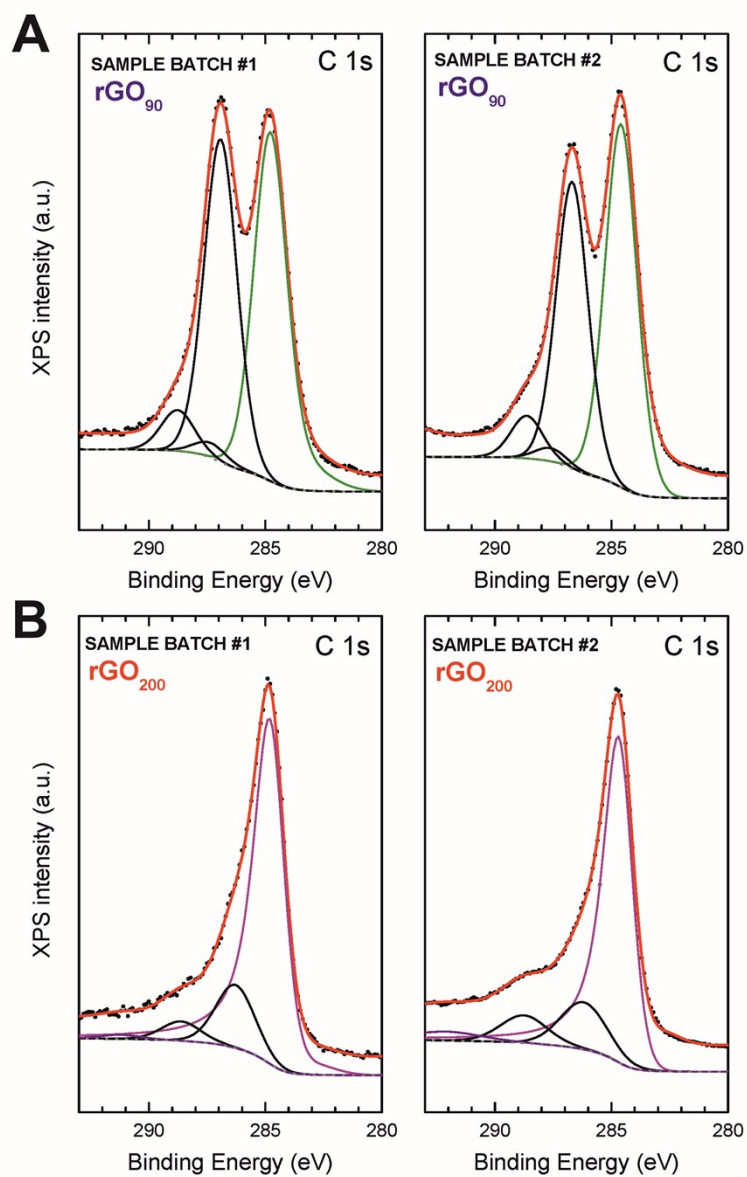

**Figure S2.** Representative XPS C1s spectra from two independent batches of rGO<sub>90</sub> and rGO<sub>200</sub> substrates. Color code as in Figure 1 in the main text.

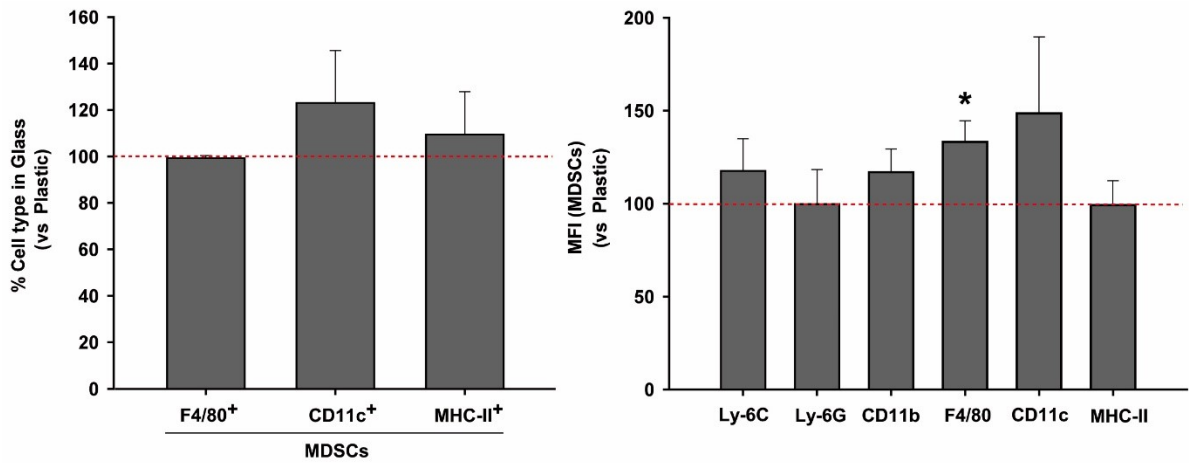

**Figure S3.** Immunophenotype of MDSCs after culture on glass coverslips does not induce remarkable modifications with respect to TCP in terms of maturation and activation. Values are expressed in cell percentage (left) and MFI values (right). Data are shown as the mean  $\pm$  standard error of the mean (N = 3 in all experiments).

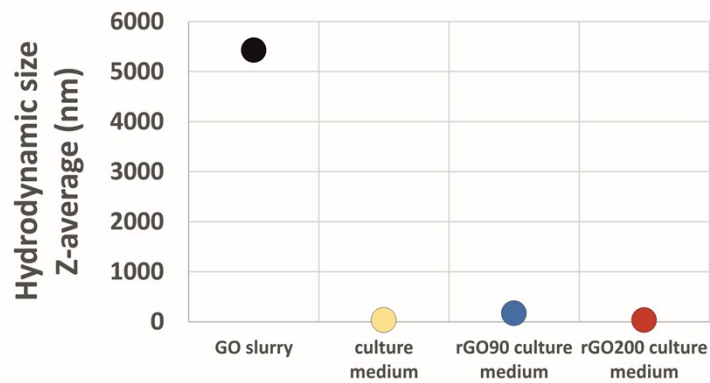

**Figure S4.** Hydrodynamic size distribution of rGO nanosheets released from rGO<sub>90</sub> and rGO<sub>200</sub> substrates by DLS in intensity.

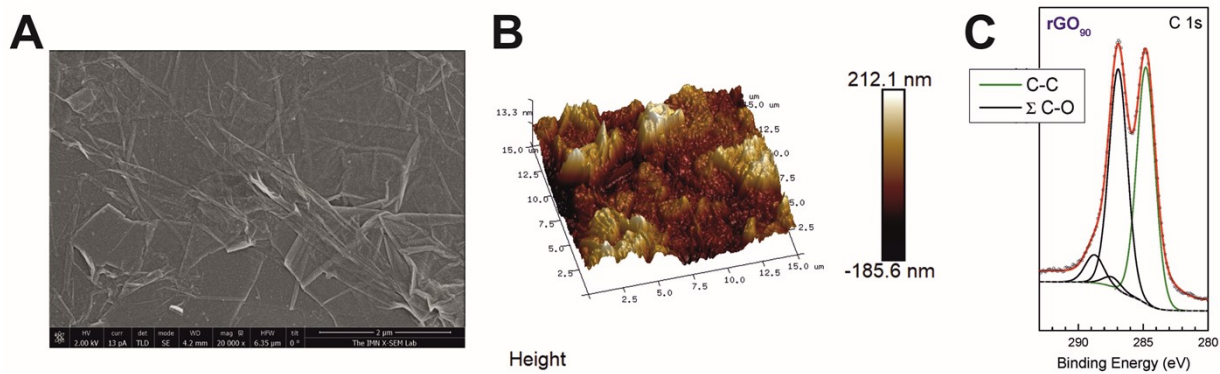

**Figure S5.** Physico-chemical properties of rGO<sub>90</sub> substrates: (A) representative SEM image, (B) AFM height image and (C) XPS C 1s spectrum.

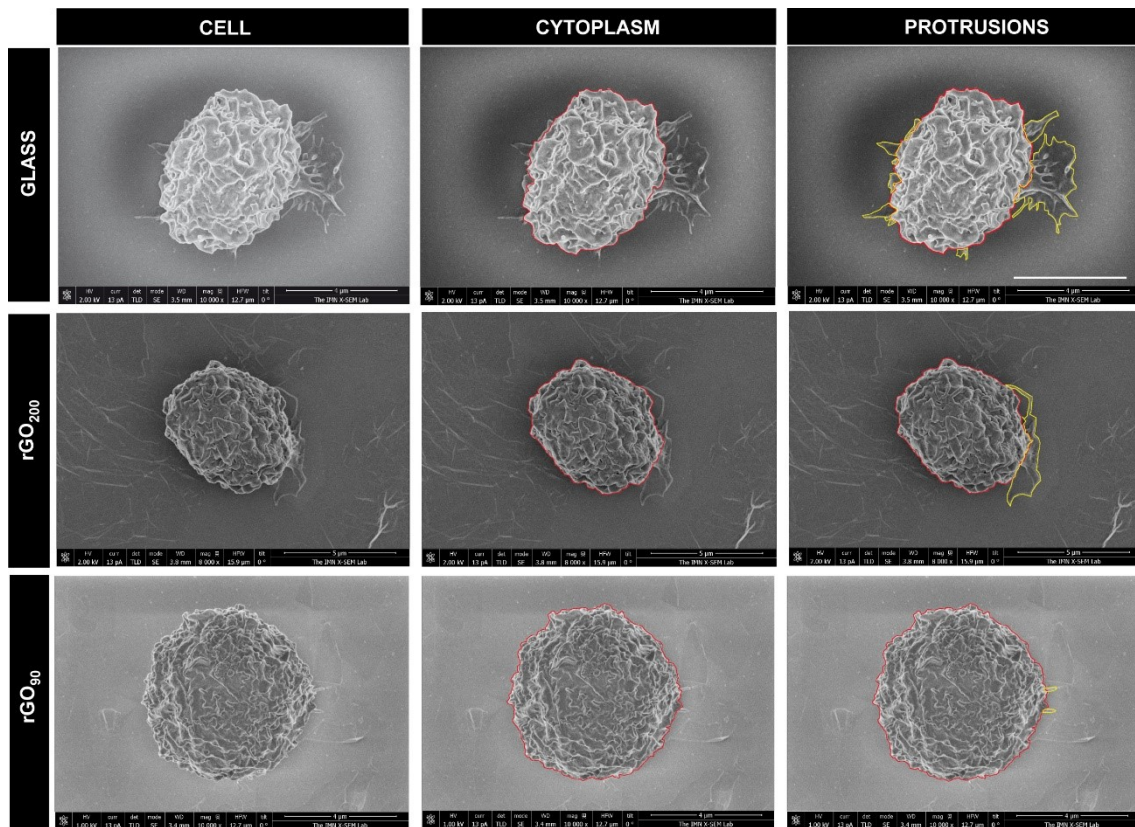

**Figure S6.** Representative SEM images of bone marrow MDSCs after 24 h culture on glass coverslips, rGO<sub>200</sub> and rGO<sub>90</sub>. Red line delimitates the cell cytoplasm. Yellow lines surround cell protrusions. Scale bar represents 4  $\mu\text{m}$  in glass and rGO<sub>90</sub> and 5  $\mu\text{m}$  in rGO<sub>200</sub>.
